# Supplementary material
Source: HighWire-hosted journal article supplement (https://bmjopenquality.bmj.com/highwire/filestream/136117/field_highwire_adjunct_files/0/ds3378.docx)
Supplement: ds3378.docx [file ds3378.docx]

| **Results table 1:** |  | CEM Standard | ED Swindon | AMU Swindon | | National Results | | | | |
| --- | --- | --- | --- | --- | --- | --- | --- | --- | --- | --- |
| Lower Quartile | Median | | Upper Quartile | |
| Were Vital signs measured and recorded in notes? | yes fully | 95% | 97% | 90% | 70% | | | 87% | | 97% |
| Partially | 95% | 100% | 93% | 100% | | | 100% | | 100% |
| Was capillary blood glucose measured and recorded on arrival? | within 20 min | 95% | 73% | 24% | 47% | | | 60% | | 77% |
| yes |  | 100% | 62% | 66% | | | 81% | | 93% |
| Is there evidence in the notes that high flow oxygen was initiated? | at any time | 95% | 90% | 24% | 40% | | | 50% | | 63% |
| not recorded |  |  | 72% | 20% | | | 33% | | 47% |
| Is there evidence in the notes that first IV crystalloid fluid bolus was given? | any time | 100% | 90% | 52% | 74% | | | 83% | | 91% |
| within 2 hours |  |  | 21% |  | | |  | |  |
| within 1 hour |  |  | 14% |  | | |  | |  |
| not recorded |  | 7% | 45% | 7% | | | 13% | | 20% |
| Is there evidence that serum lactate measurement was obtained? | any time | 95% | 93% | 66% | 67% | | | 80% | | 90% |
| Is there evidence in the notes that blood cultures were obtained? | Yes | 95% | 73% | 52% | 63% | | | 77% | | 83% |
| within 2 hours |  | 50% | 17% | 27% | | | 50% | | 71% |
| within 1 hour |  | 47% | 10% | 18% | | | 32% | | 50% |
| Were antibiotics administered? | yes | 100% | 100% | 100% | 83% | | | 90% | | 97% |
| within 2 hours | 90% | 34% | 34% | 43% | | | 57% | | 70% |
| within 1 hour | 50% |  | 10% | 17% | | | 27% | | 37% |
| Is there evidence that urine output measurements were instituted? | any time | 90% | 50% | 17% | 17% | | | 30% | | 47% |
| Was a urine catheter inserted before leaving department? | yes |  | 60% | 34% | 20% | | | 30% | | 43% |
